# Supplementary material for: Development and Validation of a Simple Index Based on Non-Enhanced CT and Clinical Factors for Prediction of Non-Alcoholic Fatty Liver Disease
Source: PubMed Central journal article supplement — Korean J Radiol. 2020 Feb 27;21(4):413–21. doi: 10.3348/kjr.2019.0703 (PMC7082659; doi:10.3348/kjr.2019.0703), 2020-02-27
Supplement: kjr-21-413-s001.pdf [file kjr-21-413-s001.pdf]

**Supplementary Table 1. Results of Bootstrap Multivariable Logistic Regression Analysis for Selecting Candidate Predictors**

| Variables         | Frequency*              |
|-------------------|-------------------------|
| Age               | 535 (53.5) <sup>†</sup> |
| Sex (female)      | 60 (6.0)                |
| BMI               | 1000 (100) <sup>†</sup> |
| AST               | 241 (24.1)              |
| ALT               | 904 (90.4) <sup>†</sup> |
| Bilirubin         | 156 (15.6)              |
| ALP               | 425 (42.5)              |
| Triglyceride      | 912 (91.2) <sup>†</sup> |
| Cholesterol       | 932 (93.2) <sup>†</sup> |
| Glucose           | 842 (84.2) <sup>†</sup> |
| Albumin           | 108 (10.8)              |
| HDL-cholesterol   | 801 (80.1) <sup>†</sup> |
| CT <sub>L-S</sub> | 1000 (100) <sup>†</sup> |

Data in parentheses are percentages. \*Number of variables included in 1000 bootstrap logistic models, <sup>†</sup>Variables selected as candidate predictors. ALP = alkaline phosphatase, ALT = alanine aminotransferase, AST = aspartate transaminase, BMI = body mass index, CT<sub>L-S</sub> = mean liver attenuation - mean spleen attenuation on non-enhanced CT, HDL = high-density lipoprotein
