# Supplementary material for: Development and Validation of a Simple Index Based on Non-Enhanced CT and Clinical Factors for Prediction of Non-Alcoholic Fatty Liver Disease
Source: PubMed Central journal article supplement — Korean J Radiol. 2020 Feb 27;21(4):413–21. doi: 10.3348/kjr.2019.0703 (PMC7082659; doi:10.3348/kjr.2019.0703), 2020-02-27
Supplement: kjr-21-413-s002.pdf [file kjr-21-413-s002.pdf]

**Supplementary Table 2. Diagnostic Performance of Logistic Models with Clinical Variables Sequentially Added to CT<sub>L-S</sub> for Predicting Non-Alcoholic Fatty Liver Disease**

| No. of Variables | Variables in Model                                                                | AUC    |
|------------------|-----------------------------------------------------------------------------------|--------|
| One              | CT <sub>L-S</sub>                                                                 | 0.794  |
| Two              | Baseline: CT <sub>L-S</sub>                                                       | 0.794  |
|                  | + BMI*                                                                            | 0.794* |
|                  | + Log (ALT)                                                                       | 0.783  |
|                  | + Log (triglyceride)                                                              | 0.789  |
|                  | + Cholesterol                                                                     | 0.772  |
| Three            | + HDL-cholesterol                                                                 | 0.769  |
|                  | Baseline: CT <sub>L-S</sub> and BMI                                               | 0.794  |
|                  | + Log (ALT)                                                                       | 0.806  |
|                  | + Log (triglyceride)*                                                             | 0.817* |
|                  | + Cholesterol                                                                     | 0.810  |
| Four             | + HDL-cholesterol                                                                 | 0.805  |
|                  | Baseline: CT <sub>L-S</sub> , BMI, and log (triglyceride)                         | 0.817  |
|                  | + Log (ALT)*                                                                      | 0.823* |
|                  | + Cholesterol                                                                     | 0.822  |
| Five             | + HDL-cholesterol                                                                 | 0.821  |
|                  | Baseline: CT <sub>L-S</sub> , BMI, log (triglyceride), and log (ALT) <sup>†</sup> | 0.823  |
|                  | + Cholesterol                                                                     | 0.827  |
|                  | + HDL-cholesterol                                                                 | 0.825  |

Logistic models including increasing number of variables were sequentially developed by adding independent variables to CT<sub>L-S</sub> in one-by-one manner. Among models with same number of variables, model with highest AUC was selected and utilized in next step. This procedure continued until addition of additional variable did not improve model performance by AUC of 0.005. \*Model selected at each step, <sup>†</sup>Variables for final logistic model. AUC = area under receiver operating characteristic curve
